# Supplementary material
Source: publisher figshare collection journal article supplement (https://frontiersin.figshare.com/ndownloader/files/15111329)
Supplement: Supplementary file [file 15111329]

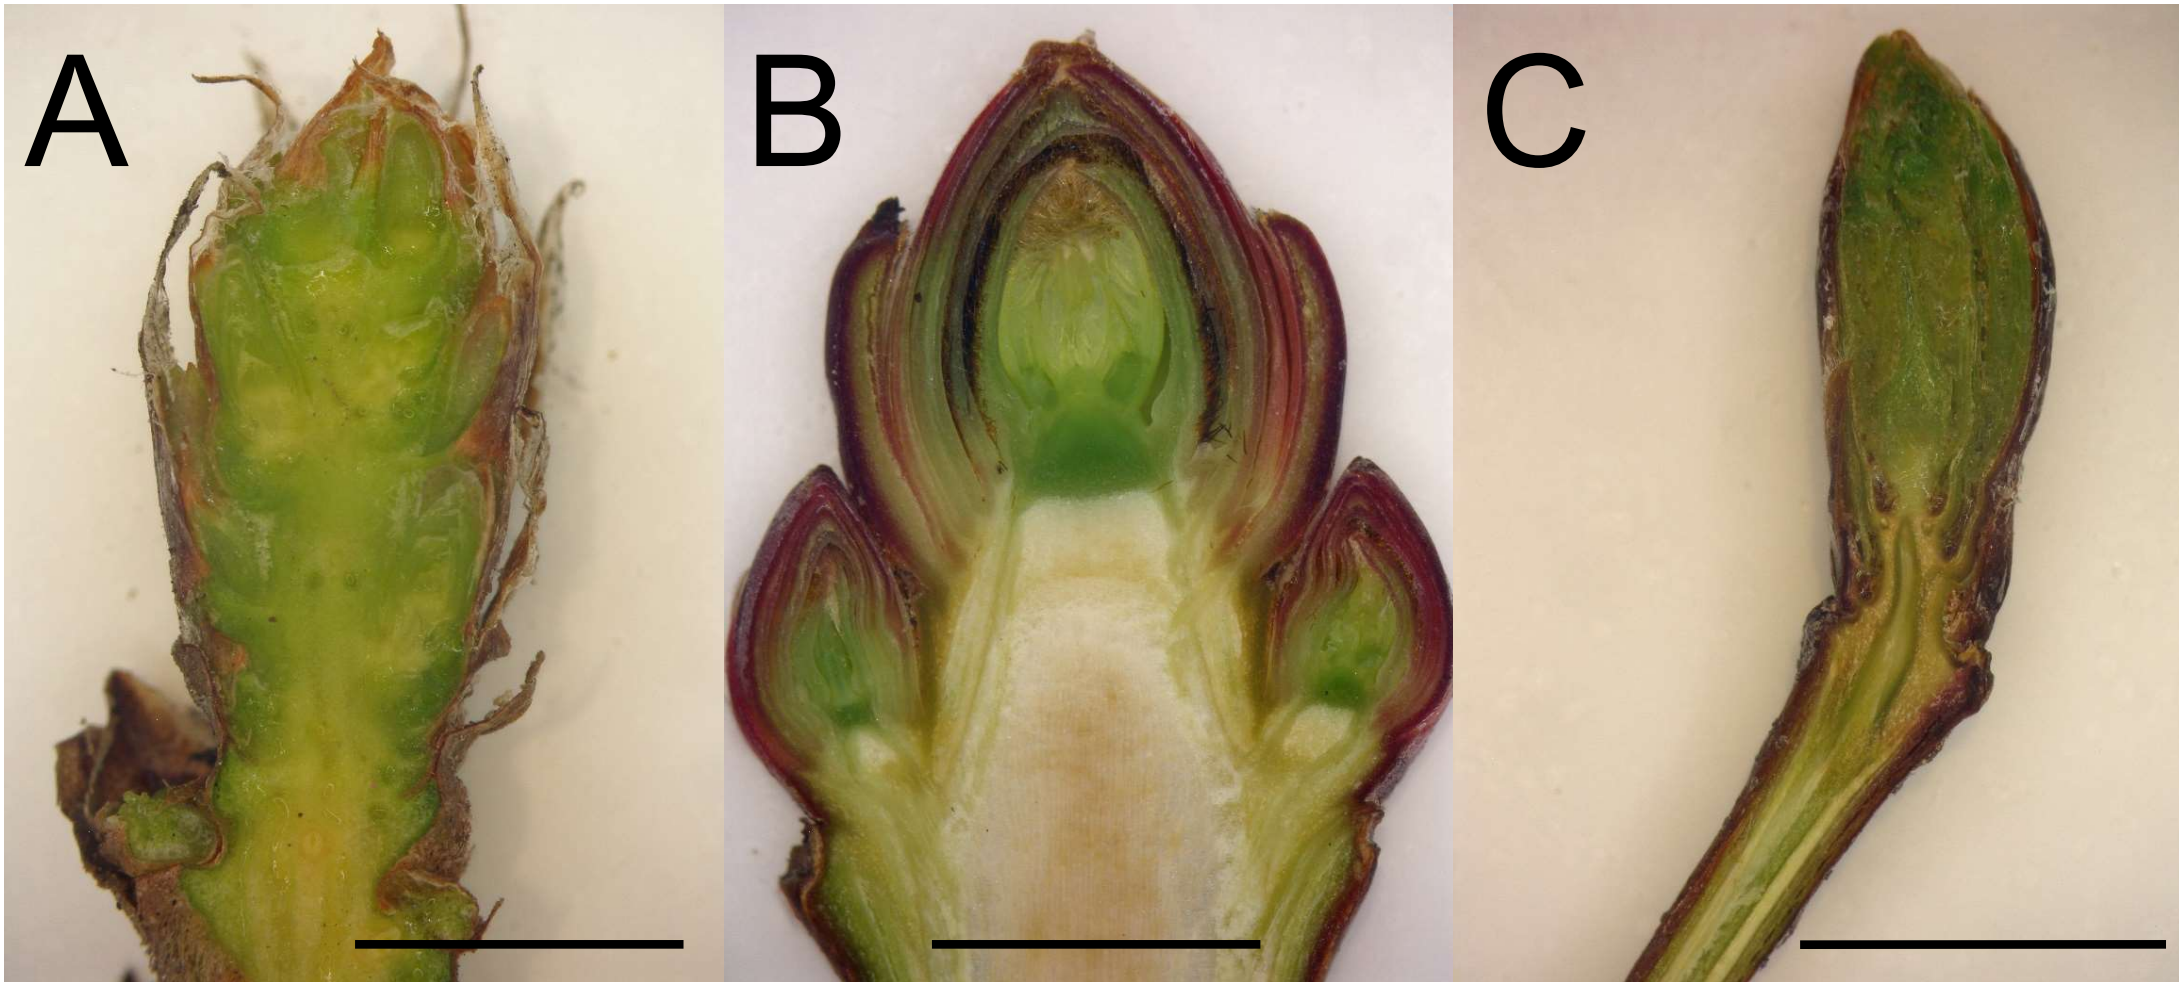

**Supplementary figure 2.** Digital colour images of longitudinally sectioned shoots bearing vegetative buds of (A) *Pinus cembra* (Type A – extracellular freezing), (B) *Acer platanoides* (Type B – temporarily supercooled) and (C) *Betula pendula* (Type C – persistently supercooled). Horizontal black bars are 5 mm.
